# Supplementary material for: Co-Removal Effect and Mechanism of Cr(VI) and Cd(II) by Biochar-Supported Sulfide-Modified Nanoscale Zero-Valent Iron in a Binary System
Source: MDPI journal article supplement (doi:10.3390/molecules27154742), 2022-07-25
Supplement: s1 [file s1]

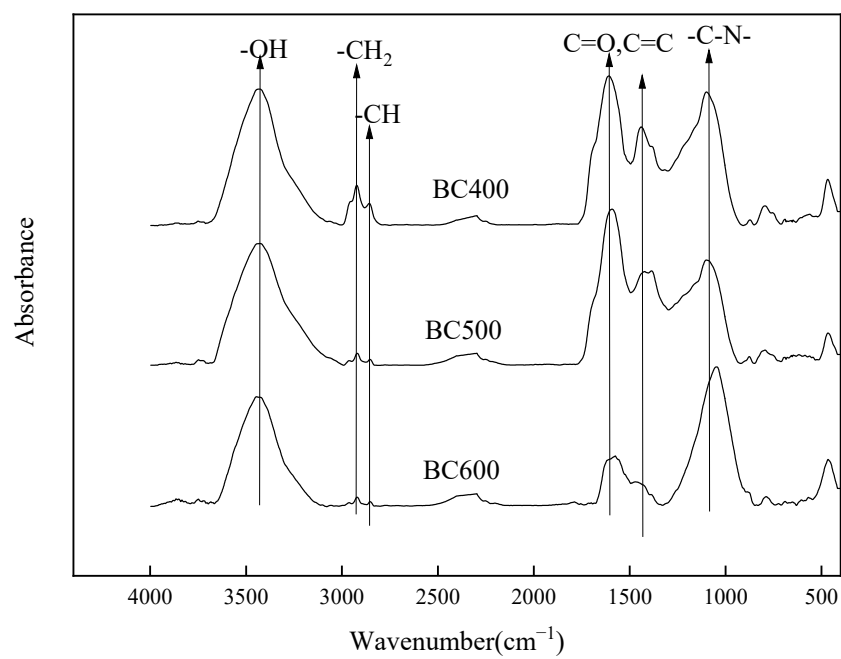

Figure.S1 FTIR spectra of BC produced at different temperatures

Table S1 Elemental analysis of BC produced at different temperatures

| Biochar | Elements (%) |       |      |      |       | Atomic ratio |      | Ash(%) | Specific surface<br>area (m <sup>2</sup> /g) | pH    |
|---------|--------------|-------|------|------|-------|--------------|------|--------|----------------------------------------------|-------|
|         | N            | C     | H    | S    | O     | H/C          | O/C  |        |                                              |       |
| BC400   | 1.41         | 55.20 | 4.23 | 0.15 | 21.30 | 0.92         | 0.29 | 13.12  | 14.83                                        | 7.6   |
| BC500   | 1.36         | 67.30 | 3.21 | 0.17 | 16.13 | 0.57         | 0.18 | 16.02  | 50.41                                        | 8.35  |
| BC600   | 1.17         | 73.20 | 1.98 | 0.18 | 14.10 | 0.32         | 0.14 | 20.14  | 80.12                                        | 9.78  |
| BC700   | 1.21         | 77.60 | 1.28 | 0.15 | 12.02 | 0.20         | 0.12 | 24.13  | 85.03                                        | 10.32 |

Table S2 Comparison of the adsorption capacities of Cr(VI) and Cd(II) by different adsorbents

| Adsorbents                             | Isotherm model | pH   | Heavy metal Adsorption |        | Ref.                            |
|----------------------------------------|----------------|------|------------------------|--------|---------------------------------|
|                                        |                |      | capacity (mg/g)        |        |                                 |
|                                        |                |      | Cd(II)                 | Cr(VI) |                                 |
| Magnetite NPs                          | Freundlich     | 6.98 | 3.00                   | 4.65   | Silva et al.(2014) [1]          |
| Sunflower head carbon (SHC)            | Langmuir       | 6    | 0.06                   | 0.02   | Jain et al.(2016) [2]           |
| Sunflower stem carbon (SSC)            | Langmuir       | 6    | 0.09                   | 0.05   |                                 |
| Halomonas BVR1 immobilized in chitosan | Langmuir       | 6.8  | 23.88                  | —      | Manasi et al.(2015) [3]         |
| Chitosan                               | Langmuir       | 6.8  | 13.84                  | —      |                                 |
| HCB/TiO2                               | Langmuir       | 2    | —                      | 27.33  | Zhang and Zhang(2014) [4]       |
| Polyaniline grafted chitosan (PGC)     | Langmuir       | 6    | 14.33                  | —      | Karthik and Meenakshi(2015) [5] |
| Ferrihydrite (Fh)                      | Langmuir       | 4.5  | —                      | 12.97  |                                 |
| Al-substituted Ferrihydrite (FAh)      | Langmuir       | 4.5  | —                      | 39.79  | Ni et al.(2016) [6]             |
| Chitosan-coated cotton gauze           | Langmuir       | 3    | —                      | 12.40  | Ferrero and Tonetti(2014) [7]   |
| NaZ-nZVI                               | Langmuir       | 4.26 | 20.60                  | —      | Tasharrofi et al.(2020) [8]     |
| BC-SnZVI                               | Langmuir       | 5    | 32.55                  | 43.10  | Present study                   |

Table S3 Assignment of the vibrational bands in the FTIR spectra

| Functional groups | Peak position        | Ref.                    |
|-------------------|----------------------|-------------------------|
| -OH               | 3440cm <sup>-1</sup> | Wang et al. (2015) [9]  |
| -COOH             | 1383cm <sup>-1</sup> | Yang et al. (2018) [10] |
| C-O               | 1119cm <sup>-1</sup> | Lyu et al. (2017) [11]  |
| Fe-O              | 600cm <sup>-1</sup>  | Qu et al. (2021) [12]   |
| Fe-S              | 473cm <sup>-1</sup>  | Yang et al. (2014) [13] |

## References

- [1] M.J. Silva-Silva, O.F. Mijangos-Ricardez, V. Vázquez-Hipólito, S. Martinez-Vargas, J. López-Luna, Single and mixed adsorption of Cd(II) and Cr(VI) onto citrate-coated magnetite nanoparticles, *Desalination Water Treat.* 57(9) (2014) 4008-4017.
- [2] M. Jain, V.K. Garg, K. Kadirvelu, M. Sillanpaa, Adsorption of heavy metals from multi-metal aqueous solution by sunflower plant biomass-based carbons, *Int J Environ Sci Technol* 13(2) (2016) 493-500.
- [3] Manasi, V. Rajesh, N. Rajesh, An indigenous Halomonas BVR1 strain immobilized in crosslinked chitosan for adsorption of lead and cadmium, *Int. J. Biol. Macromol.* 79 (2015) 300-308.

- [4] L. Zhang, Y.G. Zhang, Adsorption characteristics of hexavalent chromium on HCB/TiO<sub>2</sub>, *Appl. Surf. Sci.* 316 (2014) 649-656.
- [5] R. Karthik, S. Meenakshi, Removal of Pb(II) and Cd(II) ions from aqueous solution using polyaniline grafted chitosan, *Chem. Eng. J.* 263 (2015) 168-177.
- [6] C.Y. Ni, S. Liu, L.J. Cui, Z. Han, L. Wang, R.F. Chen, H. Liu, Adsorption performance of Cr(VI) onto Al-free and Al-substituted ferrihydrites, *RSC Adv.* 6(71) (2016) 66412-66419.
- [7] F. Ferrero, C. Tonetti, M. Periolatto, Adsorption of chromate and cupric ions onto chitosan-coated cotton gauze, *Carbohydr. Polym.* 110 (2014) 367-373.
- [8] S. Tasharrofi, Z. Rouzitalab, D.M. Maklavany, A. Esmaeili, M. Rabieezadeh, M. Askarieh, A. Rashidi, H. Taghdisian, Adsorption of cadmium using modified zeolite-supported nanoscale zero-valent iron composites as a reactive material for PRBs, *Sci. Total Environ.* 736 (2020) 139570.
- [9] Z.Y. Wang, G.C. Liu, H. Zheng, F.M. Li, H.H. Ngo, W.S. Guo, C. Liu, L. Chen, B.S. Xing, Investigating the mechanisms of biochar's removal of lead from solution, *Bioresour. Technol.* 177 (2015) 308-317.
- [10] F. Yang, S.S. Zhang, H.P. Li, S.S. Li, K. Cheng, J.S. Li, D.C.W. Tsang, Corn straw-derived biochar impregnated with alpha-FeOOH nanorods for highly effective copper removal, *Chem. Eng. J.* 348 (2018) 191-201.
- [11] H. Lyu, J. Tang, Y. Huang, L. Gai, E.Y. Zeng, K. Liber, Y. Gong, Removal of hexavalent chromium from aqueous solutions by a novel biochar supported nanoscale iron sulfide composite, *Chem. Eng. J.* 322 (2017) 516-524.
- [12] J. Qu, Y. Liu, L. Cheng, Z. Jiang, G. Zhang, F. Deng, L. Wang, W. Han, Y. Zhang, Green synthesis of hydrophilic activated carbon supported sulfide nZVI for enhanced Pb(II) scavenging from water: Characterization, kinetics, isotherms and mechanisms, *J. Hazard. Mater.* 403 (2021) 123607.
- [13] R. Yang, Y. Wang, M. Li, Y.J. Hong, A New Carbon/Ferrous Sulfide/Iron Composite Prepared by an in Situ Carbonization Reduction Method from Hemp (*Cannabis sativa* L.) Stems and Its Cr(VI) Removal Ability, *ACS Sustain. Chem. Eng.* 2(5) (2014) 1270-1279.
